# Transport mechanism of a glutamate transporter homologue Glt<sub>ph</sub>

Yurui Ji<sup>\*†</sup>, Vincent L.G. Postis<sup>‡</sup>, Yingying Wang<sup>\*</sup>, Mark Bartlam<sup>†§1</sup> and Adrian Goldman<sup>†§||1</sup>

<sup>\*</sup>College of Environmental Science and Engineering, Nankai University, Tianjin 300071, China

<sup>†</sup>Astbury Centre for Structural Molecular Biology, School of Biomedical Sciences, University of Leeds, Leeds, LS2 9JT, U.K.

<sup>‡</sup>Biomedicine Research Group, Faculty of Health and Social Sciences, Leeds Beckett University, Leeds, LS1 3JT, U.K.

<sup>§</sup>College of Life Sciences, Nankai University, Tianjin 300071, China

<sup>||</sup>Division of Biochemistry, Department of Biosciences, University of Helsinki, Helsinki, FIN-00014, Finland

## Abstract

Glutamate transporters are responsible for uptake of the neurotransmitter glutamate in mammalian central nervous systems. Their archaeal homologue Glt<sub>ph</sub>, an aspartate transporter isolated from *Pyrococcus horikoshii*, has been the focus of extensive studies through crystallography, MD simulations and single-molecule FRET (smFRET). Here, we summarize the recent research progress on Glt<sub>ph</sub>, in the hope of gaining some insights into the transport mechanism of this aspartate transporter.

## Introduction

Glutamate transporters, also known as excitatory amino acid transporters (EAATs), belong to the dicarboxylate/amino acid:cation (Na<sup>+</sup> or H<sup>+</sup>) symporter (DAACS) family [1]. In the mammalian central nervous system, neuronal and glial EAATs transport glutamate, the main neurotransmitter, from the outside to the inside of the nerve cells, removing excessive excitotoxic glutamate, which may cause neurotoxicity [2,3]. Various human diseases, such as Alzheimer's disease, epilepsy and strokes, have been linked to dysfunction of EAATs [4,5].

In humans, there are five subtypes of glutamate transporters (EAAT1–5) [6]. The transport of glutamate is driven by energy derived from ion gradients, mostly Na<sup>+</sup> [2,3,6]. In EAATs, three Na<sup>+</sup> ions and one proton are co-transported with glutamate and the transport cycle is completed by the counter-transport of one K<sup>+</sup> ion [7]. In addition to the ion-coupled transport, EAATs also display uncoupled chloride conductance [8–11] and have different preferences towards ions [10]. Therefore, glutamate transporters function both as secondary active transporters and anion-selective ion channels [8,10,12].

Despite the importance of glutamate transporters in mammalian systems, there are currently no crystal structures of a mammalian EAAT. One archaeal homologue of the glutamate transporter, Glt<sub>ph</sub>, isolated from *Pyrococcus horikoshii* glutamate transporter, has however been extensively studied over the past ten years. It shares 37% sequence identity with human EAAT2 [13,14] and many functionally

important amino acid residues are highly conserved between Glt<sub>ph</sub> and its human homologues [13], making it an excellent model system for researchers to use.

Glt<sub>ph</sub> transports aspartate together with three Na<sup>+</sup> ions into the cytoplasm [15], accompanied by a stoichiometrically uncoupled Cl<sup>-</sup> conductance as well [16]. There are thus three major differences between it and the human EAATs: first that no proton is symported with aspartate [17], second that K<sup>+</sup> ion counter-transport is not required to complete the transport cycle [17] and third, a strong preference for aspartate over glutamate [18]. In contrast, EAATs require one proton for co-transport [7], one K<sup>+</sup> ion counter-transport to complete the transport cycle [7] and transport glutamate and aspartate with similar affinity [8,11,19]. In this review, we summarize the current state of structural studies, MD simulations and single-molecule FRET (smFRET) studies of Glt<sub>ph</sub> that have provided insights into its transport mechanism – and by extension, the mechanism of the EAATs as well.

## Overall structure and domain motions of Glt<sub>ph</sub>

The outward-facing state, captured in the first crystal structure of Glt<sub>ph</sub> [13], revealed a homotrimer (Figure 1a) with a bowl-shaped extracellular-facing basin whose surface is hydrophilic and as deep as half of the trimer's height. Each wedge-shaped protomer (Figure 1b) consists of two domains: a trimerization domain formed by four transmembrane (TM) helices (TM1, TM2, TM4 and TM5) providing interactions between subunits in the trimer; and a transport domain formed by four TM helices (TM3, TM6, TM7 and TM8) and two re-entrant loops [helical hairpin (HP) structures, HP1–2] [13,20].

Comparison of the aspartate-bound structure and the structure with the competitive inhibitor DL-threo-β-benzyloxyaspartate (TBOA)-bound shows that HP2 serves

**Key words:** aspartate transporter, Cl<sup>-</sup> conductance, excitatory amino acid transporters (EAATs), Glt<sub>ph</sub>, glutamate transporter, Na<sup>+</sup> coupling.

**Abbreviations:** DEER, double electron-electron spin resonance; EAAT, excitatory amino acid transporter; Glt<sub>ph</sub>, *Pyrococcus horikoshii* glutamate transporter; HP, hairpin; smFRET, single-molecule FRET; PDB, protein data bank; TBOA, DL-threo-β-benzyloxyaspartate; TM, transmembrane.

<sup>1</sup> Correspondence may be addressed to either of these authors (email bartlam@nankai.edu.cn or a.goldman@leeds.ac.uk).

**Figure 1 | Structures of Glt<sub>ph</sub>**

(a) Trimer of Glt<sub>ph</sub> viewed from the extracellular side in the outward-facing state. Each monomer, in cartoon, is coloured differently. (b) Cartoon representation of a monomer of Glt<sub>ph</sub> shown parallel to the membrane in the outward-facing state with aspartate and two Na<sup>+</sup> ions bound. The TM helices and re-entrant loops are labelled. The substrate is shown as stick and the two Na<sup>+</sup> ions are shown as purple spheres. The black dashed lines between TM3 and TM4a represent the loop connecting the helices. (c) View of the Na<sup>+</sup>-binding sites. (d) View of the aspartate-binding site. Dashed lines show the hydrogen bonds between amino acid residues and Na<sup>+</sup> or aspartate.

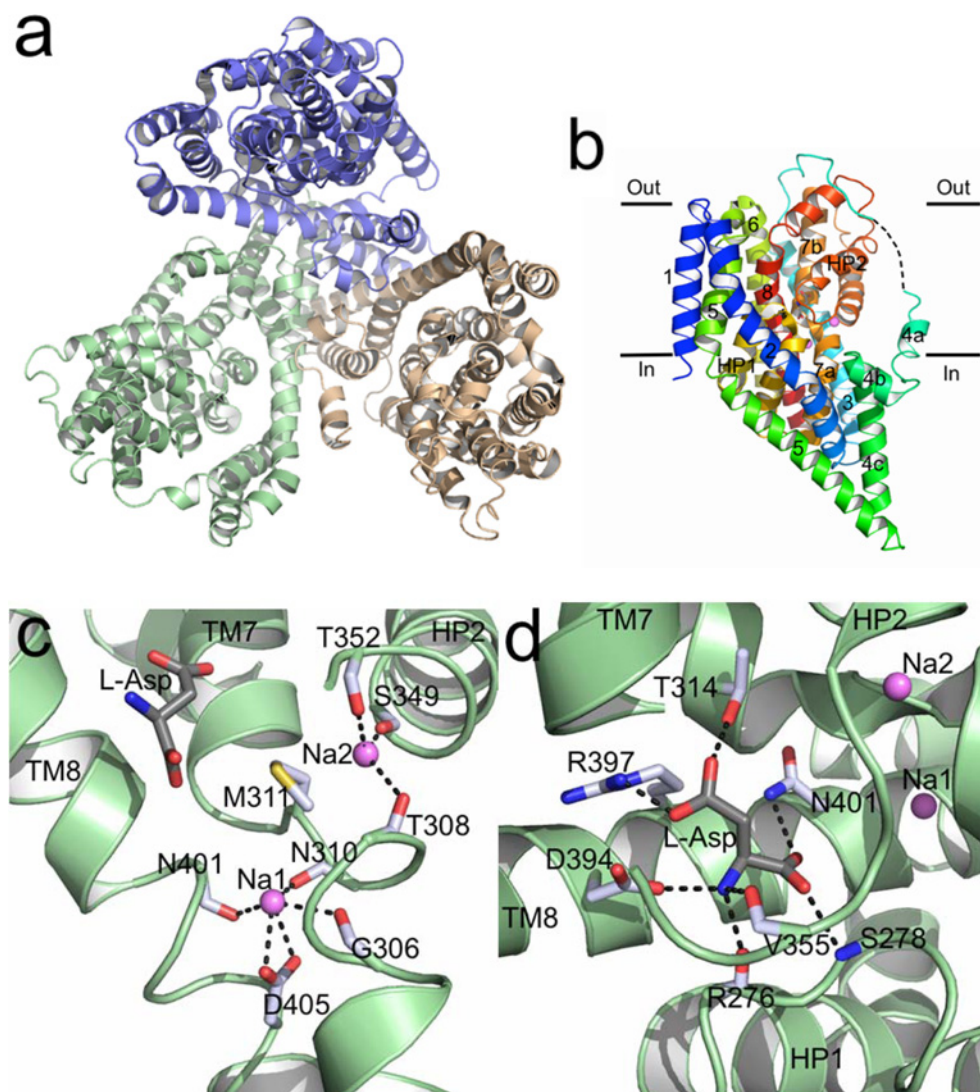

as the extracellular gate [18]. Glt<sub>ph</sub> can adopt an ‘open’ conformation (solved with TBOA bound), which allows substrate access from the outside to its binding site, at which point it switches to the ‘closed’ conformation (solve with aspartate bound). This role of HP2 has also been verified by MD studies [21,22]. HP1 was therefore proposed to function as the intracellular gate as its movement is involved in the dissociation and release into the cytoplasm of the substrate and ions [20]. However, this remains the subject of some controversy in recent MD studies, as will be discussed below (Transport Mechanism).

As the substrate-binding site in both the aspartate- and TBOA-bound structures is approximately 5 Å (1 Å=0.1 nm) beneath the extracellular surface, these two structures are called [20] the outward-facing closed (or occluded) state and outward-facing open state respectively. The inward-facing state is obtained by cross-linking of a double-cysteine mutant introduced into Glt<sub>ph</sub> [20] (Table 1). For example in the structure of Glt<sub>ph</sub>-K55C-A364C<sub>Hg</sub>, aspartate is bound approximately 5 Å beneath the intracellular surface [20].

Biochemical, crystallographic and double electron-electron spin resonance [DEER (also called PELDOR)]

**Table 1** | Summary of all currently-available crystal structures of Glt<sub>ph</sub>

| PDB ID code | Inward- or Outward-facing   | Description                                                                                                                                           |
|-------------|-----------------------------|-------------------------------------------------------------------------------------------------------------------------------------------------------|
| 1XFH        | Outward-facing              | 7 histidine introduced and Glt <sub>ph</sub> 7H used for crystallization                                                                              |
| 2NWL        | Outward-facing              | Glt <sub>ph</sub> 7H with aspartate                                                                                                                   |
| 2NWW        | Outward-facing              | Glt <sub>ph</sub> 7H with TBOA                                                                                                                        |
| 2NWX        | Outward-facing              | Glt <sub>ph</sub> 7H with aspartate and Na <sup>+</sup>                                                                                               |
| 3V8G        | Intermediate outward-facing | Cross-linked Glt <sub>ph</sub> 7H V198C–A380C <sub>Hg</sub> with aspartate and Na <sup>+</sup> .<br>One protomer in intermediate outward-facing state |
| 3V8F        | Inward-facing               | Cross-linked Glt <sub>ph</sub> 7H V216C–M385C <sub>Hg</sub> with aspartate and Na <sup>+</sup>                                                        |
| 3KBC        | Inward-facing               | Cross-linked Glt <sub>ph</sub> 7H K55C–A364C <sub>Hg</sub> with aspartate and Na <sup>+</sup>                                                         |
| 4IZM        | Outward-facing              | Cross-linked Glt <sub>ph</sub> 7H L66C–S300C <sub>Hg</sub> with aspartate and Na <sup>+</sup>                                                         |
| 4P1A        | Inward-facing               | Cross-linked Glt <sub>ph</sub> 7H K55C–A364C <sub>Hg</sub> with thallium bound (apo conformation)                                                     |
| 4P19        | Inward-facing               | Apo cross-linked Glt <sub>ph</sub> 7H K55C–A364C <sub>Hg</sub>                                                                                        |
| 4P3J        | Inward-facing               | Apo cross-linked Glt <sub>ph</sub> 7H K55C–A364C <sub>Hg</sub> in alkali-free conditions                                                              |
| 4P6H        | Inward-facing               | Cross-linked Glt <sub>ph</sub> 7H K55C–A364C <sub>Hg</sub> with thallium bound (bound conformation)                                                   |
| 4OYE        | Outward-facing              | Glt <sub>ph</sub> 6H R397A with no ligands bound                                                                                                      |
| 4OYF        | Outward-facing              | Glt <sub>ph</sub> R397A with Na <sup>+</sup> bound                                                                                                    |
| 4OYG        | Outward-facing              | Glt <sub>ph</sub> 7H R397A with aspartate and Na <sup>+</sup>                                                                                         |
| 4X2S        | Inward-facing               | Glt <sub>ph</sub> 7H R276S–M395R with aspartate and Na <sup>+</sup>                                                                                   |

spectroscopy data all demonstrate that the trimerization domain serves as a scaffold and stays in almost the same conformation during ligand binding and transport [20,23,24], whereas the transport domain, stabilized by the scaffold, undergoes large conformational changes involving a TM translation and rotation [20]. Various studies with different techniques performed on EAATs show that individual subunits in the homotrimer function independently [25–28]. Although there is no direct evidence about how the subunits in Glt<sub>ph</sub> function, it should be similar to the EEATs, given the high level of similarity between Glt<sub>ph</sub> and the EAATs.

Rigid body movement (called ‘elevator-like’ motions [29]) of the transport domain can be observed when comparing the structures of apo or holo outward-facing and inward-facing Glt<sub>ph</sub> respectively [20,30]. The elevator-like motions of the transport domain have also been observed in a smFRET study of the wild-type and a humanized mutant (R276S/ M395R) of Glt<sub>ph</sub> [31], suggesting that these motions mediate substrate uptake and are pivotal steps of the transport cycle [31,32].

Both DEER [24] and smFRET [32,33] studies on Glt<sub>ph</sub> show that the protomers in the trimer can sample different conformations randomly and independently, and individual transport domains alternate between periods of quiescence and periods of rapid transition. This is also captured in the Glt<sub>ph</sub>-V198C–A380C<sub>Hg</sub> crystal structure, with one of the protomers in the intermediate outward-facing state and the other two in the inward-facing state [34].

## Na<sup>+</sup> ion binding

The positions of two Na<sup>+</sup> ions (Na1 and Na2) have been experimentally identified: there is no direct interaction

between these two Na<sup>+</sup> ions and the bound aspartate [18]. In the outward-facing holo crystal structure, Na1 is located below the aspartate, coordinated by the main chain carbonyls of Gly<sup>306</sup> and Asn<sup>310</sup> (TM7), of Asn<sup>401</sup> (TM8) and the Asp<sup>405</sup> side chain (TM8) (Figure 1c). Of these residues, Asp<sup>405</sup> is the most important: it coordinates Na1 bidentately via the  $\gamma$ -carboxylate group, and analysis of data from the Glt<sub>ph</sub>-D405N crystals soaked in Tl<sup>+</sup> solution (an Na<sup>+</sup> mimic) found a strong peak only at the Na2, not the Na1, position and the mutant bound aspartate more weakly [18]. In the outward-facing holo crystal structure, Na2 is below the re-entrant helical HP2, coordinated by the carbonyl groups of Thr<sup>308</sup> and Met<sup>311</sup> (TM7) and of Ser<sup>349</sup> and Thr<sup>352</sup> (HP2) [18] (Figure 1c).

In both the outward-facing and inward-facing holo crystal structures, the distance between the hydroxy group of Thr<sup>308</sup> side chain and the backbone carbonyl of Pro<sup>304</sup> is approximately 4.8 Å, which is too far to form a hydrogen bond. This allows Thr<sup>308</sup> to coordinate the Na<sup>+</sup> ion at Na2. However, the Pro<sup>304</sup>–Thr<sup>308</sup> hydrogen bond exists in the outward-facing apo crystal structure [30] and the outward-facing crystal structure of Glt<sub>ph</sub> with TBOA bound [18]. In the outward-facing apo crystal structure, the HP2 loop is collapsed into the aspartate binding and Na2 sites as well [30]. In the structure of Glt<sub>ph</sub> in complex with TBOA, HP2 moves approximately 10 Å away from the position where it is in the outward-facing holo structure and therefore cannot coordinate an Na<sup>+</sup> ion at Na2 [18]. Steered molecular dynamics (SMD) simulations suggested that the breaking of the hydrogen bond between Pro<sup>304</sup> and Thr<sup>308</sup> destabilizes the last turn of the TM7a helix and allows readjustment of the backbone carbonyl oxygen atoms,

placing them in a favourable position to coordinate the second  $\text{Na}^+$  ion [35]: this role for Thr<sup>308</sup> has been verified by experimentally measuring the involvement of three Thr<sup>308</sup> mutants (T308W/T308A/T308V) in binding and transport [35]. However, superposition of the outward-facing apo Glt<sub>ph</sub> structure and the outward-facing Glt<sub>ph</sub> structure with  $\text{Na}^+$  bound at Na1 shows that ion binding to Na1 releases HP2 to free the aspartate binding and Na2 sites into a conformation similar to that in the outward-facing holo structure, breaking the hydrogen bond between Thr<sup>308</sup> and Pro<sup>304</sup> as well [30].

The third  $\text{Na}^+$ -binding site (Na3) is difficult to observe structurally, because binding at the third site would lead to conformational change and transport. Consequently, opinions vary regarding its position [36–38]. An MD simulation [38] based on the aspartate-bound and TBOA-bound structures [18] predicted a new binding site for Na3, which differs from previous MD simulation results [36,37]. Bastug et al. [38] predicted that the third  $\text{Na}^+$  ion is coordinated by the side chains of Thr<sup>92</sup>, Ser<sup>93</sup>, Asn<sup>310</sup>, Asp<sup>312</sup> and the backbone of Tyr<sup>89</sup>. They were able to verify this experimentally: the T92A and S93A variants showed different changes in aspartate affinity but both exhibited a reduction in  $\text{Na}^+$  affinity compared with wild-type Glt<sub>ph</sub>. In addition, Asn<sup>310</sup> and Asp<sup>312</sup> are both part of the highly conserved NMDGT motif [18]; Thr<sup>314</sup> in the motif is involved in aspartate binding [18] and mutations of the equivalent residue (Thr<sup>400</sup>) in EAAT2 abolish its function [39].

## Uncoupled chloride ion conductance

A stoichiometrically uncoupled  $\text{Cl}^-$  conductance is observed along with aspartate transport in Glt<sub>ph</sub> [16]. This  $\text{Cl}^-$  conductance can partially neutralize the membrane potential caused by the electrogenic substrate transport. The anion selectivity of Glt<sub>ph</sub> is almost the same as that of EAATs. Mutation of a conserved amino acid (S65V in Glt<sub>ph</sub>, located in TM2) strongly affects the chloride conductance with almost no effect on the  $\text{Na}^+$ : aspartate symporter [16], similar to results observed in EAAT1 (S103V) [40]. Clearly,  $\text{Cl}^-$  permeates through a specific pathway [16] and Ser<sup>65</sup> is somehow involved in the process. In a recent MD simulation [41], however, researchers were unable to find any evidence showing that Ser<sup>65</sup> interacts directly with  $\text{Cl}^-$ . Combined with experimental evidence obtained from both Glt<sub>ph</sub> and EAAT4, they proposed that Ser<sup>65</sup> exerts its effect on anion permeation by altering the rates of conformational changes leading to the open anion channel.

A recent study combined MD simulations with fluorescence spectroscopy of Glt<sub>ph</sub> and patch-clamp recordings of mammalian EAATs [41]. The authors suggested that lateral movement of the transport domain triggers formation of the anion-selective permeation pathway only if the domain sampled intermediate transporter conformations, rather than outward- or inward-facing states. They predicted residues that line the ion permeation pathway by simulation and verified these predictions through fluorescence spectroscopy and functional studies on mutant transporters. Of the residues

lining the pathway, the side chain of Arg<sup>276</sup> protrudes from the tip of HP1 into the  $\text{Cl}^-$  permeation pathway and this resulting positive charge contributes to the anion selectivity for both Glt<sub>ph</sub> and the EAATs [41]. This residue is also involved in the binding of substrates [18,30]. Interaction with the substrate does not compromise its role in anion permeation and selectivity [41].

## Substrate affinity and binding

Although Glt<sub>ph</sub> is a glutamate transporter homologue, it exhibits a strong preference for aspartate as a substrate in the presence of an  $\text{Na}^+$  gradient. It shows 60000-fold higher affinity for aspartate (with  $K_d$  values for aspartate and glutamate of approximately 2 nM and 122  $\mu\text{M}$  respectively) [18]. The aspartate-binding site consists of the tips of HP1 and HP2, the conserved NMDGT motif of TM7 (see above) and hydrophilic residues on TM8 [18] (Figure 1d). The  $\alpha$ -carboxyl group of the substrate interacts with the side chain of Asn<sup>401</sup> (TM8) and the main chain amide nitrogen of Ser<sup>278</sup> (HP1), whereas the  $\gamma$ -carboxyl group interacts with the side chains of Thr<sup>314</sup> (TM7) and Arg<sup>397</sup> (TM8). The substrate amino group interacts with the side chain of Asp<sup>394</sup> (TM8) and the backbone carbonyl groups of Arg<sup>276</sup> (HP1) and Val<sup>355</sup> (HP2) (Figure 1d).

## Transport mechanism of the aspartate transporter Glt<sub>ph</sub>

Binding thermodynamics studies show that aspartate binding and release, rather than TM movements of the transport domains, is coupled to the chemical potential of sodium ions in solution [42].

Structural comparison of outward-facing apo and holo-Glt<sub>ph</sub> shows that in the apo structure, there is joint movement of HP2 and TM8a and also reorganization of ligand-binding sites including HP2, the NMDGT motif and TM3. The HP2 loop region collapses into the substrate- and Na2-binding sites. The movements of side chains in the NMDGT motif (Asn<sup>310</sup> and Met<sup>311</sup>) and the bending away of TM3 from the motif deform the Na1 site [30]. These distortions mean that  $\text{Na}^+$  can no longer bind. (Similar distortion of ligand-binding sites also has been observed in the outward-facing apo structure of Glt<sub>TK</sub> [43], which has 77% sequence identity with Glt<sub>ph</sub>).

Binding of  $\text{Na}^+$  and aspartate trigger different movements of HP2, with the binding of the former causing HP2 to open and allow binding of Na2, whereas the binding of the latter causes HP2 to close [44]. Binding of aspartate and the  $\text{Na}^+$  at the Na2 site is coupled as both sites are partly formed by the tip of HP2 [30] (Figure 2). A binding thermodynamics study of Glt<sub>ph</sub> also suggests that binding of the first two  $\text{Na}^+$  is involved in the modification of the substrate-binding site, whereas the binding of the third  $\text{Na}^+$  is coupled to the substrate occlusion from outside solvent [42]. During the ligand binding process, with the exception of extracellular gate HP2 closure, other unknown

**Figure 2 | The  $\text{Glt}_{\text{ph}}$  transport cycle**

Model of the  $\text{Glt}_{\text{ph}}$  transport cycle for a monomer based on available crystal structures and MD simulations on the binding and release order of the ligands. Protein data bank (PDB) codes are in parentheses. The helical HP structure in red is HP2 and the blue one is HP1. The purple circles represent  $\text{Na}^+$  ions binding at Na1, Na2 and Na3. The grey ellipse represents aspartate. Starting from the upper left corner, in the outward-facing apo structure,  $\text{Na}^+$  ion binding at Na1 triggers structural changes in the transport domain and HP2, which opens the aspartate and Na2 sites to conformations similar to that in the holo transporter [30]. After aspartate and  $\text{Na}^+$  ion bind to their corresponding binding sites, there is a further, unknown conformational change linked to the binding of Na3 before movement across the membrane. Once the transport domain reaches the intracellular side, through opening of the intercellular gate, the substrates release into cytoplasm. The transport domain stays compacted with collapsed ligand-binding sites, which make it suitable for TM movement, thus completing the transport cycle [30]. There are as yet no experimental data on the position of the third  $\text{Na}^+$  ion-binding site or the binding order of the ligands.

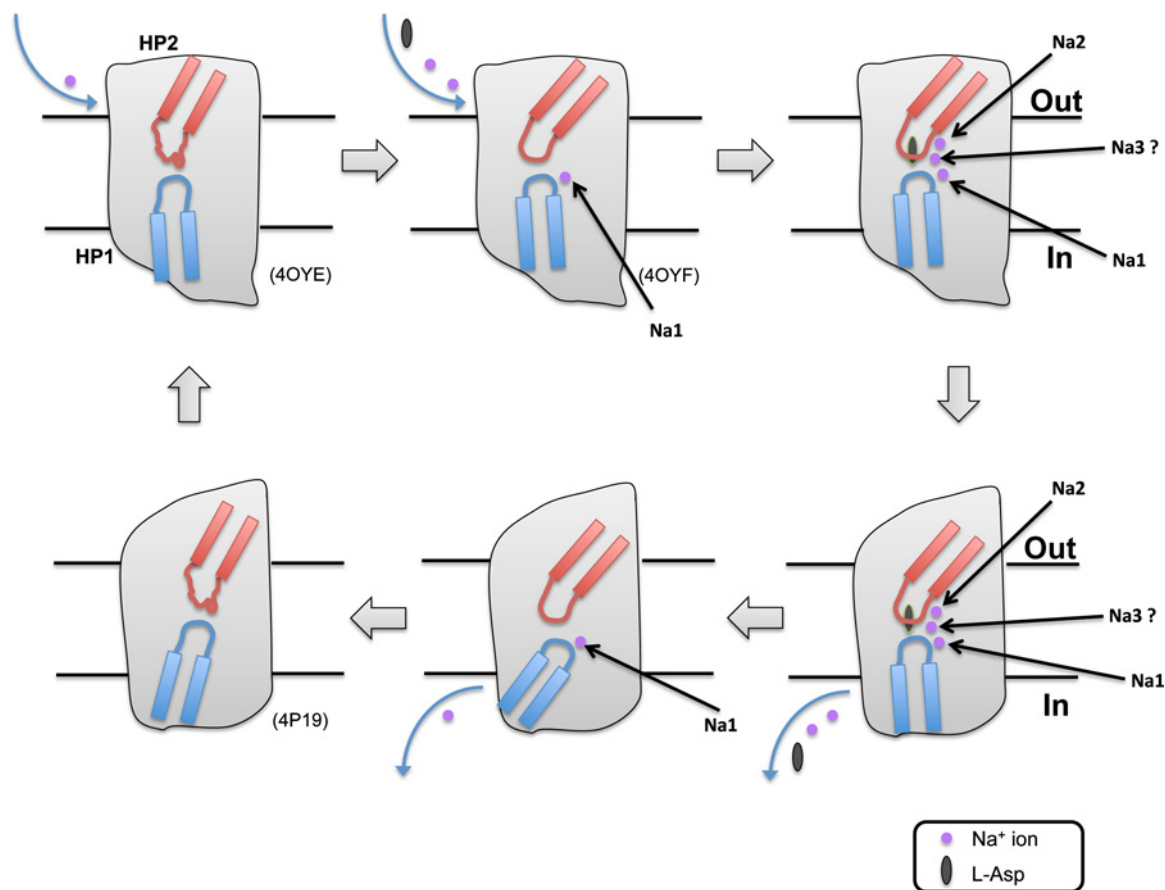

conformational changes dominate the process and remain to be elucidated by further research [42]. After the ligands are fully bound to the transport domain and occluded from the solvent by the closure of both HP1 and HP2, the transport domain moves across the membrane as a rigid body [20] (Figure 2).

Simulations based on the inward-facing crystal structure of  $\text{Glt}_{\text{ph}}$  have provided preliminary insights into the process of substrate release into the cytoplasm. DeChancie et al. [45] suggested that release is initiated by dissociation of  $\text{Na}^+$  from the Na2 site and, almost simultaneously, opening of the HP2 loop exposes the substrate and other polar and charged groups. This attracts water molecules to the substrate-binding

site, which further destabilizes interactions between substrate and protein residues on HP2 and TM8. The HP1 loop then opens, disrupting the strong hydrogen bonds between the SSS motif (Ser<sup>277</sup>–Ser<sup>279</sup>) on the HP1 loop and the substrate, allowing the aspartate to dissociate. In this model, HP2 serves as an activator of the intracellular HP1 gate [45]. However, a previous simulation suggested that HP2 is in fact the intracellular gate in the inward-facing state [46]. In this model, HP2 opening is a prerequisite for substrate release into the cytoplasm. Understanding the mechanism of substrate release requires further research.

Following substrate release, the transport domain undergoes a series of conformational changes to prepare itself

for the TM movement. The conformational changes in the inward-facing apo structure are that though all of the ligand-binding sites are distorted, the apo transport domain is as closed and compact as in the fully bound structure [30] (Figure 2). This may be critical for the transport domain to transit to the outward-facing state.

## Outlook

Although crystallographic, MD simulations and smFRET studies have greatly increased our understanding of the Glt<sub>ph</sub> transport mechanism, there are still many questions yet to be answered, including a definitive answer to the position of the third Na<sup>+</sup> ion, the mechanism of substrate binding and release, and how the transport cycle is completed. Single-molecule and structural studies backed up by computational studies should yield definitive insights into the mechanism of substrate release and the transition to the outward-facing state in Glt<sub>ph</sub>. However, to understand the differences between it and the EEATs, for instance the differing substrate and ion transport specificity, will require high-resolution structures of the EEATs, either by X-ray crystallography or – possibly – by EM using the new generation of microscopes.

## Acknowledgements

Adrian Goldman thanks Royal Society and Wolfson Foundation for Royal Society Wolfson Research Merit Award.

## Funding

This work was supported by the China Scholarship Council (to Y.J.); the Wellcome Trust [grant number 019322/7/10/Z]; the Erkko Foundation [grant number 4704339] and the Biotechnology and Biological Sciences Research Council (BBSRC) [grant number BB/M021610/1] (all to A.G.) the Ministry of Science & Technology 973 Project [grant number 2014CB560709 (to M.B.)]; and the National Science Foundation of China [grant number 31322012 (to Y.W.)].

## References

- Saier, M.H., Tran, C.V. and Barabote, R.D. (2006) TCDB: the transporter classification database for membrane transport protein analyses and information. *Nucleic Acids Res* **34**, 181–186 [CrossRef](#)
- Otis, T.S., Kavanaugh, M.P. and Jahr, C.E. (1997) Postsynaptic glutamate transport at the climbing fiber-Purkinje cell synapse. *Science* **277**, 1515–1518 [CrossRef](#) [PubMed](#)
- Tanaka, K., Watake, K., Manabe, T., Yamada, K., Watanabe, M., Takahashi, K., Iwama, H., Nishikawa, T., Ichihara, N. and Kikuchi, T. (1997) Epilepsy and exacerbation of brain injury in mice lacking the glutamate transporter GLT-1. *Science* **276**, 1699–1702 [CrossRef](#) [PubMed](#)
- Yi, J.-H. and Hazell, A.S. (2006) Excitotoxic mechanisms and the role of astrocytic glutamate transporters in traumatic brain injury. *Neurochem. Int.* **48**, 394–403 [CrossRef](#) [PubMed](#)
- Fontana, A.C. (2015) Current approaches to enhance glutamate transporter function and expression. *J. Neurochem.* **134**, 982–1007 [CrossRef](#) [PubMed](#)
- Danbolt, N.C. (2001) Glutamate uptake. *Prog. Neurobiol.* **65**, 1–105 [CrossRef](#) [PubMed](#)
- Zerangue, N. and Kavanaugh, M.P. (1996) Flux coupling in a neuronal glutamate transporter. *Nature* **383**, 634–637 [CrossRef](#) [PubMed](#)
- Fairman, W.A., Vandenberg, R.J., Arriza, J.L., Kavanaugh, M.P. and Amara, S.G. (1995) An excitatory amino-acid transporter with properties of a ligand-gated chloride channel. *Nature* **15**, 599–603 [CrossRef](#)
- Vandenberg, R.J., Arriza, J.L., Amara, S.G. and Kavanaugh, M.P. (1995) Constitutive ion fluxes and substrate binding domains of human glutamate transporters. *J. Biol. Chem.* **270**, 17668–17671 [CrossRef](#) [PubMed](#)
- Wadiche, J.I., Amara, S.G. and Kavanaugh, M.P. (1995) Ion fluxes associated with excitatory amino acid transport. *Neuron* **15**, 721–728 [CrossRef](#) [PubMed](#)
- Arriza, J.L., Eliasof, S., Kavanaugh, M.P. and Amara, S.G. (1997) Excitatory amino acid transporter 5, a retinal glutamate transporter coupled to a chloride conductance. *Proc. Natl. Acad. Sci. U.S.A.* **94**, 4155–4160 [CrossRef](#) [PubMed](#)
- Sonders, M.S. and Amara, S.G. (1996) Channels in transporters. *Curr. Opin. Neurobiol.* **6**, 294–302 [CrossRef](#) [PubMed](#)
- Yernool, D., Boudker, O., Jin, Y. and Gouaux, E. (2004) Structure of a glutamate transporter homologue from *Pyrococcus horikoshii*. *Nature* **431**, 811–818 [CrossRef](#) [PubMed](#)
- Slotboom, D.J., Konings, W.N. and Lolkema, J.S. (1999) Structural features of the glutamate transporter family. *Microbiol. Mol. Biol. Rev.* **63**, 293–307 [PubMed](#)
- Groeneveld, M. and Slotboom, D.-J. (2010) Na<sup>+</sup>: aspartate coupling stoichiometry in the glutamate transporter homologue Glt<sub>ph</sub>. *Biochemistry* **49**, 3511–3513 [CrossRef](#) [PubMed](#)
- Ryan, R.M. and Mindell, J.A. (2007) The uncoupled chloride conductance of a bacterial glutamate transporter homolog. *Nat. Struct. Mol. Biol.* **14**, 365–371 [CrossRef](#) [PubMed](#)
- Ryan, R.M., Compton, E.L. and Mindell, J.A. (2009) Functional characterization of a Na<sup>+</sup>-dependent aspartate transporter from *Pyrococcus horikoshii*. *J. Biol. Chem.* **284**, 17540–17548 [CrossRef](#) [PubMed](#)
- Boudker, O., Ryan, R.M., Yernool, D., Shimamoto, K. and Gouaux, E. (2007) Coupling substrate and ion binding to extracellular gate of a sodium-dependent aspartate transporter. *Nature* **445**, 387–393 [CrossRef](#) [PubMed](#)
- Arriza, J.L., Fairman, W.A., Wadiche, J.I., Murdoch, G.H., Kavanaugh, M.P. and Amara, S.G. (1994) Functional comparisons of three glutamate transporter subtypes cloned from human motor cortex. *J. Neurosci.* **14**, 5559–5569 [PubMed](#)
- Reyes, N., Ginter, C. and Boudker, O. (2009) Transport mechanism of a bacterial homologue of glutamate transporters. *Nature* **462**, 880–885 [CrossRef](#) [PubMed](#)
- Huang, Z. and Tajkhorshid, E. (2008) Dynamics of the extracellular gate and ion-substrate coupling in the glutamate transporter. *Biophys. J.* **95**, 2292–2300 [CrossRef](#) [PubMed](#)
- Shrivastava, I.H., Jiang, J., Amara, S.G. and Bahar, I. (2008) Time-resolved mechanism of extracellular gate opening and substrate binding in a glutamate transporter. *J. Biol. Chem.* **283**, 28680–28690 [CrossRef](#) [PubMed](#)
- Groeneveld, M. and Slotboom, D.-J. (2007) Rigidity of the subunit interfaces of the trimeric glutamate transporter GLT during translocation. *J. Mol. Biol.* **372**, 565–570 [CrossRef](#) [PubMed](#)
- Hänelt, I., Wunnicke, D., Bordignon, E., Steinhoff, H.-J. and Slotboom, D.J. (2013) Conformational heterogeneity of the aspartate transporter Glt<sub>ph</sub>. *Nat. Struct. Mol. Biol.* **20**, 210–214 [CrossRef](#) [PubMed](#)
- Greuer, C., Balani, P., Weidenfeller, C., Bartusel, T., Tao, Z. and Rauen, T. (2005) Individual subunits of the glutamate transporter EAAC1 homotrimer function independently of each other. *Biochemistry* **44**, 11913–11923 [CrossRef](#) [PubMed](#)
- Leary, G.P., Stone, E.F., Holley, D.C. and Kavanaugh, M.P. (2007) The glutamate and chloride permeation pathways are colocalized in individual neuronal glutamate transporter subunits. *J. Neurosci.* **27**, 2938–2942 [CrossRef](#) [PubMed](#)
- Koch, H.P., Brown, R.L. and Larsson, H.P. (2007) The glutamate-activated anion conductance in excitatory amino acid transporters is gated independently by the individual subunits. *J. Neurosci.* **27**, 2943–2947 [CrossRef](#) [PubMed](#)

- 28 Koch, H.P. and Larsson, H.P. (2005) Small-scale molecular motions accomplish glutamate uptake in human glutamate transporters. *J. Neurosci.* **25**, 1730–1736 [CrossRef PubMed](#)
- 29 Ryan, R.M. and Vandenberg, R.J. (2016) Elevating the alternating-access model. *Nat. Struct. Mol. Biol.* **23**, 187–189 [CrossRef PubMed](#)
- 30 Verdon, G., Oh, S., Serio, R.N. and Boudker, O. (2014) Coupled ion binding and structural transitions along the transport cycle of glutamate transporters. *eLife* **3**, e02283 [CrossRef PubMed](#)
- 31 Akyuz, N., Georgieva, E.R., Zhou, Z., Stolzenberg, S., Cuendet, M.A., Khelashvili, G., Altman, R.B., Terry, D.S., Freed, J.H., Weinstein, H. et al. (2015) Transport domain unlocking sets the uptake rate of an aspartate transporter. *Nature* **518**, 68–73 [CrossRef PubMed](#)
- 32 Akyuz, N., Altman, R.B., Blanchard, S.C. and Boudker, O. (2013) Transport dynamics in a glutamate transporter homologue. *Nature* **502**, 114–118 [CrossRef PubMed](#)
- 33 Erkens, G.B., Hänelt, I., Goudsmits, J.M.H., Slotboom, D.J. and van Oijen, A.M. (2013) Unsynchronised subunit motion in single trimeric sodium-coupled aspartate transporters. *Nature* **502**, 119–123 [CrossRef PubMed](#)
- 34 Verdon, G. and Boudker, O. (2012) Crystal structure of an asymmetric trimer of a bacterial glutamate transporter homolog. *Nat. Struct. Mol. Biol.* **19**, 355–357 [CrossRef PubMed](#)
- 35 Venkatesan, S., Saha, K., Sohail, A., Sandtner, W., Freissmuth, M., Ecker, G.F., Sitte, H.H. and Stockner, T. (2015) Refinement of the central steps of substrate transport by the aspartate transporter GltPh: elucidating the role of the Na<sub>2</sub> sodium binding site. *PLoS Comput. Biol.* **11**, e1004551 [CrossRef PubMed](#)
- 36 Huang, Z. and Tajkhorshid, E. (2010) Identification of the third Na<sup>+</sup> site and the sequence of extracellular binding events in the glutamate transporter. *Biophys. J.* **99**, 1416–1425 [CrossRef PubMed](#)
- 37 Larsson, H.P., Wang, X., Lev, B., Bacongus, I., Caplan, D.A., Vyleta, N.P., Koch, H.P., Diez-Sampedro, A. and Noskov, S.Y. (2010) Evidence for a third sodium-binding site in glutamate transporters suggests an ion/substrate coupling model. *Proc. Natl. Acad. Sci. U.S.A.* **107**, 13912–13917 [CrossRef PubMed](#)
- 38 Bastug, T., Heinzlmann, G., Kuyucak, S., Salim, M., Vandenberg, R.J. and Ryan, R.M. (2012) Position of the third Na<sup>+</sup> site in the aspartate transporter Glt<sub>ph</sub> and the human glutamate transporter, EAAT1. *PLoS One* **7**, e33058 [CrossRef PubMed](#)
- 39 Zarbiv, R., Grunewald, M., Kavanaugh, M.P. and Kanner, B.I. (1998) Cysteine scanning of the surroundings of an alkali-ion binding site of the glutamate transporter GLT-1 reveals a conformationally sensitive residue. *J. Biol. Chem.* **273**, 14231–14237 [CrossRef PubMed](#)
- 40 Ryan, R.M., Mitrovic, A.D. and Vandenberg, R.J. (2004) The chloride permeation pathway of a glutamate transporter and its proximity to the glutamate translocation pathway. *J. Biol. Chem.* **279**, 20742–20751 [CrossRef PubMed](#)
- 41 Machtens, J.-P., Kortzak, D., Lansche, C., Leinenweber, A., Kilian, P., Begemann, B., Zachariae, U., Ewers, D., de Groot, B.L. and Briones, R. (2015) Mechanisms of anion conduction by coupled glutamate transporters. *Cell* **160**, 542–553 [CrossRef PubMed](#)
- 42 Reyes, N., Oh, S. and Boudker, O. (2013) Binding thermodynamics of a glutamate transporter homolog. *Nat. Struct. Mol. Biol.* **20**, 634–640 [CrossRef PubMed](#)
- 43 Jensen, S., Guskov, A., Rempel, S., Hänelt, I. and Slotboom, D.J. (2013) Crystal structure of a substrate-free aspartate transporter. *Nat. Struct. Mol. Biol.* **20**, 1224–1226 [CrossRef PubMed](#)
- 44 Focke, P.J., Moenne-Loccoz, P. and Larsson, H.P. (2011) Opposite movement of the external gate of a glutamate transporter homolog upon binding cotransported sodium compared with substrate. *J. Neurosci.* **31**, 6255–6262 [CrossRef PubMed](#)
- 45 DeChancie, J., Shrivastava, I.H. and Bahar, I. (2011) The mechanism of substrate release by the aspartate transporter Glt<sub>ph</sub>: insights from simulations. *Mol. Biosyst.* **7**, 832–842 [CrossRef PubMed](#)
- 46 Zomot, E. and Bahar, I. (2013) Intracellular gating in an inward-facing state of aspartate transporter Glt<sub>ph</sub> is regulated by the movements of the helical hairpin HP2. *J. Biol. Chem.* **288**, 8231–8237 [CrossRef PubMed](#)

Received 3 February 2016  
doi:10.1042/BST20160055
